# Supplementary material for: Office-Based Addiction Treatment Retention and Mortality Among People Experiencing Homelessness
Source: PubMed Central journal article supplement (PMC7933994; doi:10.1001/jamanetworkopen.2021.0477), 2021-03-04
Supplement: jamanetwopen-e210477-s001.pdf [file jamanetwopen-e210477-s001.pdf]

## Supplementary Online Content

Fine DR, Lewis E, Weinstock K, Wright J, Gaeta JM, Baggett TP. Office-based addiction treatment retention and mortality among people experiencing homelessness. *JAMA Netw Open*. 2021;4(3):e210477. doi:10.1001/jamanetworkopen.2021.0477

**eTable 1.** *International Classification of Diseases–10th Edition (ICD-10) Codes Used to Define Cause of Death*

**eTable 2.** List of *ICD* Code Algorithms and Their Sources

**eFigure 1.** Mortality Rates Among People Experiencing Homelessness Who Engaged in an Office-Based Addiction Treatment Program

**eTable 3.** Sensitivity Analysis Including OBAT Attendance, Buprenorphine Adherence, and Opioid Abstinence

**eTable 4.** Sensitivity Analysis Including OBAT Attendance as a Continuous Variable

**eFigure 2.** Point-Prevalent Addiction Treatment-Related Outcomes Over 12 Months Among People Experiencing Homelessness Who Engaged in an Office-Based Addiction Treatment (OBAT) Program

### eReferences

This supplementary material has been provided by the authors to give readers additional information about their work.

**eTable 1. International Classification of Diseases – 10<sup>th</sup> Edition (ICD-10) codes used to define cause of death**

| <b>Underlying cause of death</b>                                                                                                                                                                                                                                                                                   | <b>ICD-10 codes</b>        |
|--------------------------------------------------------------------------------------------------------------------------------------------------------------------------------------------------------------------------------------------------------------------------------------------------------------------|----------------------------|
| External causes                                                                                                                                                                                                                                                                                                    | V01-Y98                    |
| Drug overdose                                                                                                                                                                                                                                                                                                      | X40-X44, Y10-Y14           |
| Alcohol poisoning                                                                                                                                                                                                                                                                                                  | X45, Y15                   |
| Suicide                                                                                                                                                                                                                                                                                                            | X60-X84, Y87.0             |
| Homicide                                                                                                                                                                                                                                                                                                           | X85-Y09, Y87.1             |
| Accidents (unintentional injuries)                                                                                                                                                                                                                                                                                 | V01-V99, Y85               |
| Other accidents (non-poisoning)                                                                                                                                                                                                                                                                                    | W00-X39, X50-X59, Y86      |
| Natural causes                                                                                                                                                                                                                                                                                                     |                            |
| Sepsis                                                                                                                                                                                                                                                                                                             | A40-A41                    |
| Viral hepatitis                                                                                                                                                                                                                                                                                                    | B15-B19                    |
| HIV disease                                                                                                                                                                                                                                                                                                        | B20-B24                    |
| Cancer                                                                                                                                                                                                                                                                                                             | C00-C97                    |
| Diabetes                                                                                                                                                                                                                                                                                                           | E10-E14                    |
| Psychoactive substance use disorder                                                                                                                                                                                                                                                                                | F10-F19                    |
| Anoxic brain injury                                                                                                                                                                                                                                                                                                | G93.1                      |
| Other diseases of the nervous system                                                                                                                                                                                                                                                                               | G12, G93                   |
| Heart disease                                                                                                                                                                                                                                                                                                      | I00-I09, I11, I13, I20-I51 |
| Cerebrovascular disease                                                                                                                                                                                                                                                                                            | I60-I69                    |
| Influenza and pneumonia                                                                                                                                                                                                                                                                                            | J10-J18                    |
| Chronic lower respiratory diseases                                                                                                                                                                                                                                                                                 | J40-J47                    |
| Other diseases of the respiratory system                                                                                                                                                                                                                                                                           | J81                        |
| Liver disease                                                                                                                                                                                                                                                                                                      | K70-K77                    |
| Nephritis, nephrotic syndrome, and nephrosis                                                                                                                                                                                                                                                                       | N00-N07, N17-N19, N25-N27  |
| Congenital malformations of the heart                                                                                                                                                                                                                                                                              | Q23                        |
| Ill-defined conditions                                                                                                                                                                                                                                                                                             | R00-R99, K229              |
| Source: Centers for Disease Control and Prevention. ICD-10 Cause-of-Death Lists for Tabulating Mortality Statistics. National Center for Health Statistics. 2005.<br><a href="https://www.in.gov/isdh/reports/mortality/2005/im9_2002_pdf.pdf">https://www.in.gov/isdh/reports/mortality/2005/im9_2002_pdf.pdf</a> |                            |

| <b>eTable 2. List of ICD code algorithms and their sources</b> |                                                                                                                                                                                                                                                                                 |                                                                       |
|----------------------------------------------------------------|---------------------------------------------------------------------------------------------------------------------------------------------------------------------------------------------------------------------------------------------------------------------------------|-----------------------------------------------------------------------|
| <b>Covariate</b>                                               | <b>ICD Code Algorithm</b>                                                                                                                                                                                                                                                       | <b>Source</b>                                                         |
| Alcohol use disorder                                           | <b>ICD 9 codes:</b> 291.x, 303.0x, 303.9x, 305.x, 357.5, 425.5, 535.30, 535.31, 571.1, 571.2, 571.3<br><b>ICD 10 codes:</b> E860.0, F10.x                                                                                                                                       | Heslin KC et al. <sup>1</sup>                                         |
| Cardiovascular disease                                         | <b>ICD-9 codes:</b> 410.x, 412.x,<br><b>ICD-10 codes:</b> I21.x, I22.x, I25.2                                                                                                                                                                                                   | Quan et al. <sup>2</sup>                                              |
| Cerebrovascular disease                                        | <b>ICD-9 codes:</b> 362.34, 430.x–438.x<br><b>ICD-10 codes:</b> G45.x, G46.x, H34.0, I60.x–I69.x                                                                                                                                                                                | Quan et al. <sup>2</sup>                                              |
| Chronic Kidney disease                                         | <b>ICD-9 codes:</b> 403.01, 403.11, 403.91, 404.02, 404.03, 404.12, 404.13, 404.92, 404.93, 582.x, 583.0–583.7, 585.x, 586.x, 588.0, V42.0, V45.1, V56.x<br><b>ICD-10 codes:</b> I12.0, I13.1, N03.2–N03.7, N05.2–N05.7, N18.x, N19.x, N25.0, Z49.0–Z49.2, Z94.0, Z99.2         | Quan et al. <sup>2</sup>                                              |
| Chronic lung disease                                           | <b>ICD-9 codes:</b> 416.8, 416.9, 490.x–505.x, 506.4, 508.1, 508.8<br><b>ICD-10 codes:</b> I27.8, I27.9, J40.x–J47.x, J60.x–J67.x, J68.4, J70.1, J70.3                                                                                                                          | Quan et al. <sup>2</sup>                                              |
| Cold related injury                                            |                                                                                                                                                                                                                                                                                 | --                                                                    |
| Frostbite                                                      | <b>ICD-9 codes:</b> 991.0, 991.1, 991.2, 991.3<br><b>ICD-10 codes:</b> T33, T34                                                                                                                                                                                                 |                                                                       |
| Hypothermia                                                    | <b>ICD-9 codes:</b> 991.6<br><b>ICD-10 codes:</b> T68                                                                                                                                                                                                                           |                                                                       |
| Immersion Foot                                                 | <b>ICD-9 codes:</b> 991.4<br><b>ICD-10 codes:</b> T69.02                                                                                                                                                                                                                        |                                                                       |
| Congestive heart failure                                       | <b>ICD-9 codes:</b> 398.91, 402.01, 402.11, 402.91, 404.01, 404.03, 404.11, 404.13, 404.91, 404.93, 425.4–425.9, 428.x<br><b>ICD-10 codes:</b> I09.9, I11.0, I13.0, I13.2, I25.5, I42.0, I42.5–I42.9, I43.x, I50.x, P29.0                                                       | Quan et al. <sup>2</sup>                                              |
| Hepatitis C infection                                          | <b>ICD-9 codes:</b> 070.41, 070.44, 070.51, 070.54, 070.7x<br><b>ICD-10 codes:</b> B17.1, B18.2, B19.2                                                                                                                                                                          | Niu B et al. <sup>3</sup>                                             |
| HIV                                                            | <b>ICD-9 codes:</b> 042.x–044.x, V08<br><b>ICD10 codes:</b> B20.x–B22.x, B24.x, Z21                                                                                                                                                                                             | Quan et al. <sup>2</sup>                                              |
| Liver disease                                                  | <b>ICD-9 codes:</b> 070.22, 070.23, 070.32, 070.33, 070.6, 070.9, 456.0–456.2, 570.x, 571.x, 572.2–572.8, 573.3, 573.4, 573.8, 573.9, V42.7<br><b>ICD-10 Codes:</b> B18.0, B18.1, I85.x, I86.4, I98.2, K70.x, K71.1, K71.3–K71.5, K71.7, K72.x–K74.x, K76.0, K76.2–K76.9, Z94.4 | Adapted from Quan et al. <sup>2</sup><br>(excluded hepatitis C codes) |
| Malignancy                                                     | <b>ICD-9 codes:</b> 140.x–172.x, 174.x–195.8, 200.x–208.x, 238.6, 196.x–199.x<br><b>ICD-10 codes:</b> C00.x–C26.x, C30.x–C34.x, C37.x–C41.x, C43.x, C45.x–C58.x, C60.x–C76.x, C81.x–C85.x, C88.x, C90.x–C97.x, C77.x–C80.x                                                      | Quan et al. <sup>2</sup>                                              |

| Covariate                                                                                                                                                                                                                      | ICD Code Algorithm                                                                                                                                                                                                                                                                                                                                                                                                                                                                                                                                                                                  | Source                                                                  |
|--------------------------------------------------------------------------------------------------------------------------------------------------------------------------------------------------------------------------------|-----------------------------------------------------------------------------------------------------------------------------------------------------------------------------------------------------------------------------------------------------------------------------------------------------------------------------------------------------------------------------------------------------------------------------------------------------------------------------------------------------------------------------------------------------------------------------------------------------|-------------------------------------------------------------------------|
| <p>Other Drug Use Disorders</p> <p>Amphetamine use disorder</p> <p>Cannabis use disorder</p> <p>Cocaine use disorder</p> <p>Hallucinogen use disorder</p> <p>Sedative use disorder</p> <p>Other/polysubstance use disorder</p> | <p><b>ICD-9 codes:</b> 304.4x, 305.7x<br/><b>ICD-10 codes:</b> F15.x</p> <p><b>ICD-9 codes:</b> 304.3x, 305.2x<br/><b>ICD-10 codes:</b> F12.x</p> <p><b>ICD-9 codes:</b> 304.2, 305.6, 968.5<br/><b>ICD-10 codes:</b> E938.5, F14.x</p> <p><b>ICD-9 codes:</b> 304.5x, 305.3x, 969.6<br/><b>ICD-10 codes:</b> E939.6, F16.x</p> <p><b>ICD-9 codes:</b> 304.1x, 305.4x<br/><b>ICD-10 codes:</b> F13.x</p> <p><b>ICD-9 codes:</b> 304.6x, 304.8x, 304.9x, 305.9x, 648.3x, V654.2<br/><b>ICD-10 codes:</b> F18.x, F19.x</p>                                                                            | <p>Heslin KC et al.<sup>1</sup></p>                                     |
| <p>Serious bacterial infection</p> <p>Endocarditis</p> <p>Epidural Abscess</p> <p>Septic Arthritis</p> <p>Osteomyelitis</p>                                                                                                    | <p><b>ICD-9 codes:</b> 036.42, 098.84, 112.81, 115.04, 115.14, 115.94, 421.0, 421.1, 421.9, 424.90, 424.91, 424.99<br/><b>ICD-10 codes:</b> A39.51, A54.83, B37.6, I33.0, I33.9, I38, I39</p> <p><b>ICD-9 codes:</b> 324.0, 324.1, 324.9<br/><b>ICD-10 codes:</b> G06, G07, G08</p> <p><b>ICD-9 codes:</b> 003.23, 036.82, 711.0x-711.4x, 711.6x, 711.9x<br/><b>ICD-10 codes:</b> A02.23, A39.83, M00.0x, M00.1x, M00.2x, M00.8x, M00.9, M01.Xx</p> <p><b>ICD-9 codes:</b> 003.24, 730.0x, 730.2x, 730.8x, 730.9x<br/><b>ICD-10 codes:</b> A02.24, M86.0x, M86.1x, M86.2x, M86.8, M86.8X, M86.9</p> | <p>Ronin, MV and Herzig, SJ<sup>4</sup>; Schranz et al.<sup>5</sup></p> |
| <p>Serious Mental Illness</p> <p>Bipolar disorder</p> <p>Schizophrenia</p>                                                                                                                                                     | <p><b>ICD-9 codes:</b> 296.0x, 296.4x, 296.5x, 296.6x, 296.7, 296.8x<br/><b>ICD-10 codes:</b> F31</p> <p><b>ICD-9 codes:</b> 295.xx<br/><b>ICD-10 codes:</b> F20, F25</p>                                                                                                                                                                                                                                                                                                                                                                                                                           | <p>--</p>                                                               |

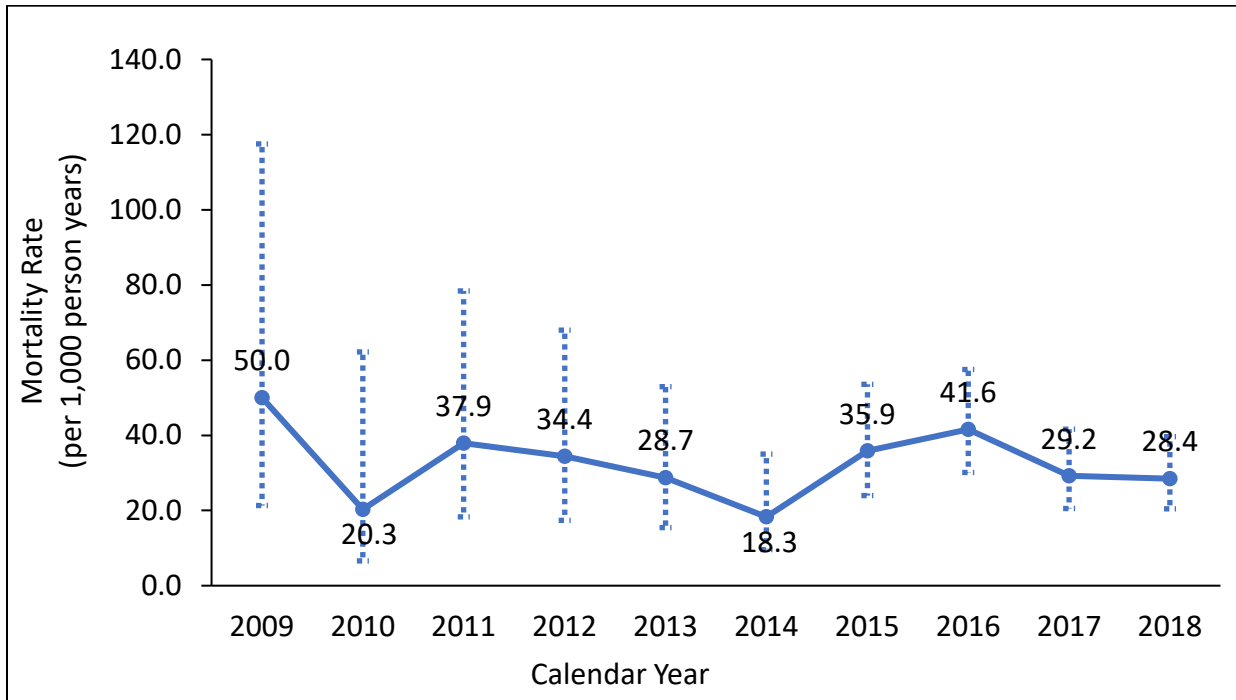

**Figure 1. Mortality rates among people experiencing homelessness who engaged in an office-based addiction treatment program.** Point estimates represent deaths per 1,000 person-years and vertical blue dashed-lines represent 95% confidence intervals.

**eTable 3. Sensitivity analysis including OBAT attendance, buprenorphine adherence, and opioid abstinence**

| <b>Addiction treatment-related characteristics</b> | <b>Adjusted<sup>a</sup> Hazard Ratio<br/>(95% CI)</b> | <b>p value</b> |
|----------------------------------------------------|-------------------------------------------------------|----------------|
| OBAT attendance                                    |                                                       |                |
| Out of care                                        | ref                                                   | ref            |
| In care                                            | 0.43 (0.24, 0.78)                                     | <0.01          |
| Buprenorphine toxicology <sup>b</sup>              |                                                       |                |
| Buprenorphine negative                             | ref                                                   | ref            |
| Buprenorphine positive                             | 0.47 (0.18, 1.21)                                     | 0.12           |
| Opioid toxicology <sup>b</sup>                     |                                                       |                |
| Opioid positive                                    | ref                                                   | ref            |
| Opioid negative                                    | 0.37 (0.18, 0.78)                                     | <0.01          |

<sup>a</sup> Model also adjusted for age, sex, race/ethnicity, housing status, Charlson comorbidity index, alcohol use disorder, other drug use disorder, serious mental illness, year of first OBAT encounter, and site of first OBAT encounter  
<sup>b</sup> Missing indicator method used for buprenorphine toxicology and opioid toxicology results

| <b>eTable 4. Sensitivity analysis including OBAT attendance as a continuous variable</b>                                                                                                                                                         |                                                       |                |
|--------------------------------------------------------------------------------------------------------------------------------------------------------------------------------------------------------------------------------------------------|-------------------------------------------------------|----------------|
| <b>Addiction treatment-related characteristic</b>                                                                                                                                                                                                | <b>Adjusted<sup>a</sup> Hazard Ratio<br/>(95% CI)</b> | <b>p value</b> |
| OBAT attendance (per additional visit)                                                                                                                                                                                                           | 0.96 (0.95, 0.98)                                     | <0.01          |
| <sup>a</sup> Model also adjusted for age, sex, race/ethnicity, housing status, Charlson comorbidity index, alcohol use disorder, other drug use disorder, serious mental illness, year of first OBAT encounter, and site of first OBAT encounter |                                                       |                |

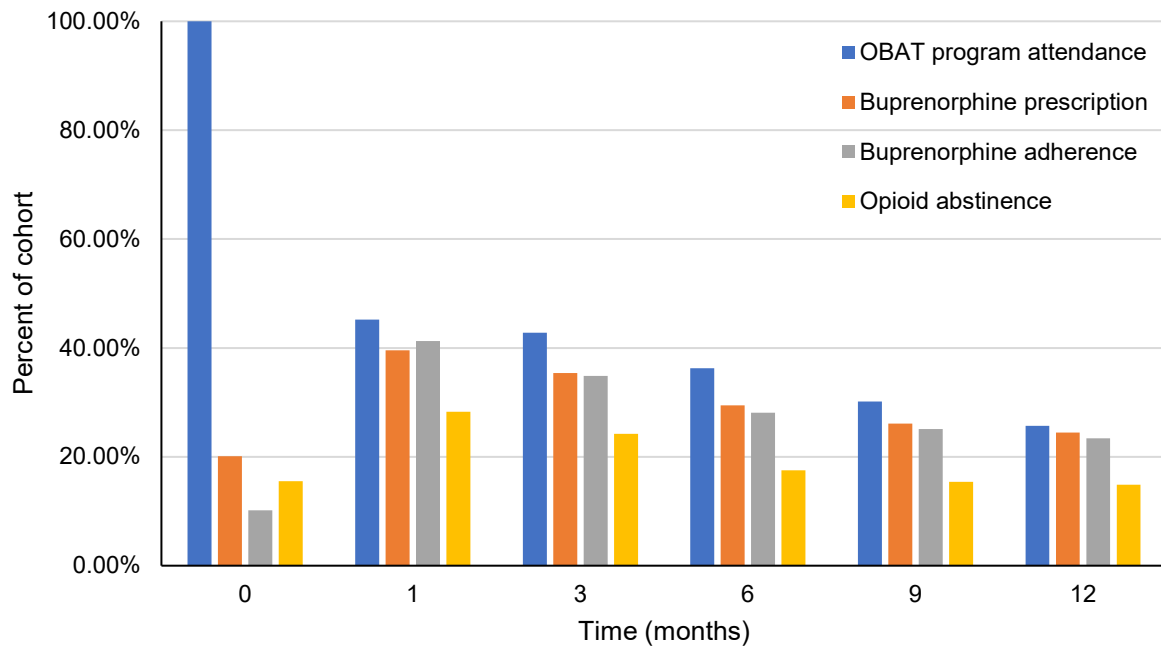

**eFigure 2. Point-prevalent addiction treatment-related outcomes over 12 months among people experiencing homelessness who engaged in an office-based addiction treatment (OBAT) program.** Estimates of point-prevalent OBAT program attendance (blue bars), point-prevalent buprenorphine prescriptions (orange bars), point-prevalent positive buprenorphine toxicology results (grey bars), and point-prevalent negative opioid toxicology results (yellow bars) at the first OBAT encounter (Time=0) and 1, 3, 6, 9, and 12 months.



## eReferences

1. Heslin KC EA, Steiner CA. Hospitalizations Involving Mental and Substance Use Disorders Among Adults, 2012. HCUP Statistical Brief #191. *Agency for Healthcare Research and Quality*. 2015.
2. Quan H, Sundararajan V, Halfon P, et al. Coding algorithms for defining comorbidities in ICD-9-CM and ICD-10 administrative data. *Med Care*. 2005;43(11):1130-1139.
3. Niu B, Forde KA, Goldberg DS. Coding algorithms for identifying patients with cirrhosis and hepatitis B or C virus using administrative data. *Pharmacoepidemiol Drug Saf*. 2015;24(1):107-111.
4. Ronan MV, Herzig SJ. Hospitalizations Related To Opioid Abuse/Dependence And Associated Serious Infections Increased Sharply, 2002-12. *Health Aff (Millwood)*. 2016;35(5):832-837.
5. Schranz AJ, Fleischauer A, Chu VH, Wu LT, Rosen DL. Trends in Drug Use-Associated Infective Endocarditis and Heart Valve Surgery, 2007 to 2017: A Study of Statewide Discharge Data. *Ann Intern Med*. 2018.
